# Supplementary material for: By up-regulating μ- and δ-opioid receptors, neuron-restrictive silencer factor knockdown promotes neurological recovery after ischemia
Source: PubMed Central journal article supplement (PMC5731852; doi:10.18632/oncotarget.18195), 2017-05-23
Supplement: oncotarget-08-101012-s001.pdf [file oncotarget-08-101012-s001.pdf]

## By up-regulating $\mu$ - and $\delta$ -opioid receptors, neuron-restrictive silencer factor knockdown promotes neurological recovery after ischemia

### SUPPLEMENTARY MATERIALS

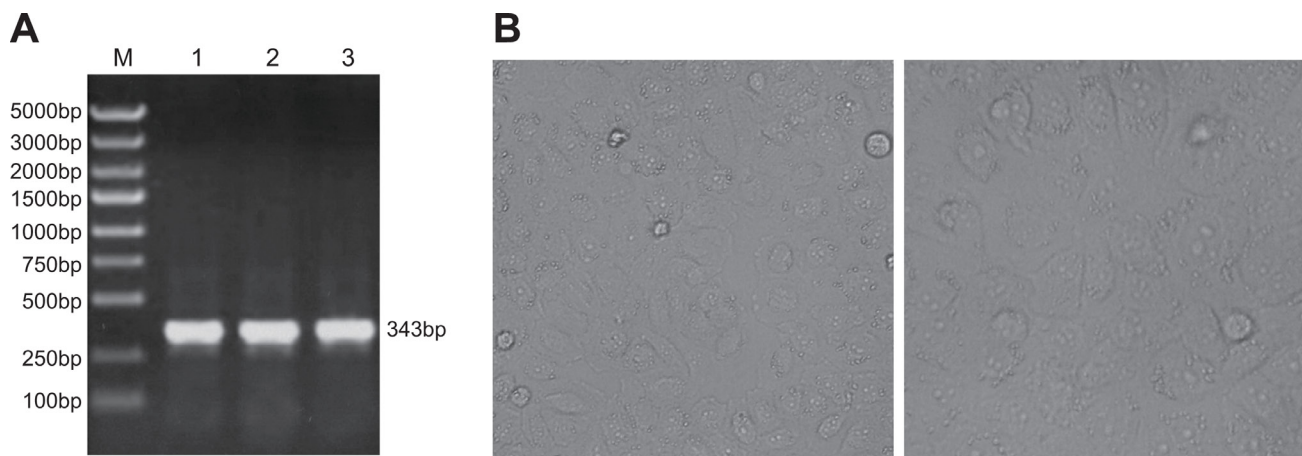

**Supplementary Figure 1:** Identification of recombinant plasmids after enzyme digestion using qRT-PCR (A) and 239T cells with CPE (B). qRT-PCR, quantitative real-time polymerase chain reaction; CPE, cytopathic effect; M, marker; 1, 2 and 3 are three positive clones.
